# Supplementary material for: The Algal Polysaccharide Ulvan and Carotenoid Astaxanthin Both Positively Modulate Gut Microbiota in Mice
Source: MDPI journal article supplement (doi:10.3390/foods11040565), 2022-02-16

Figure S1. Total operational taxonomic unit (OTU) count before and after rarefaction analysis. Rarefaction curves (a) before and (b) after normalization (22,900 sequences).

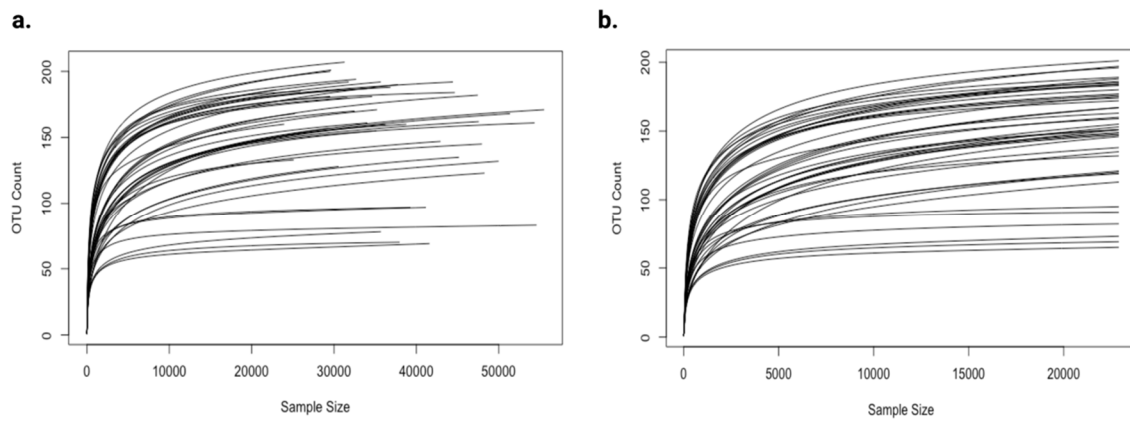

Supplement: s1 [file s1]
